# Supplementary material for: Blood-Feeding Induces Reversible Functional Changes in Flight Muscle Mitochondria of Aedes aegypti Mosquito
Source: PubMed Central journal article supplement (PMC2773413; doi:10.1371/journal.pone.0007854), 2009-11-16
Supplement: pone.0007854.s002.pdf [file pone.0007854.s002.pdf]

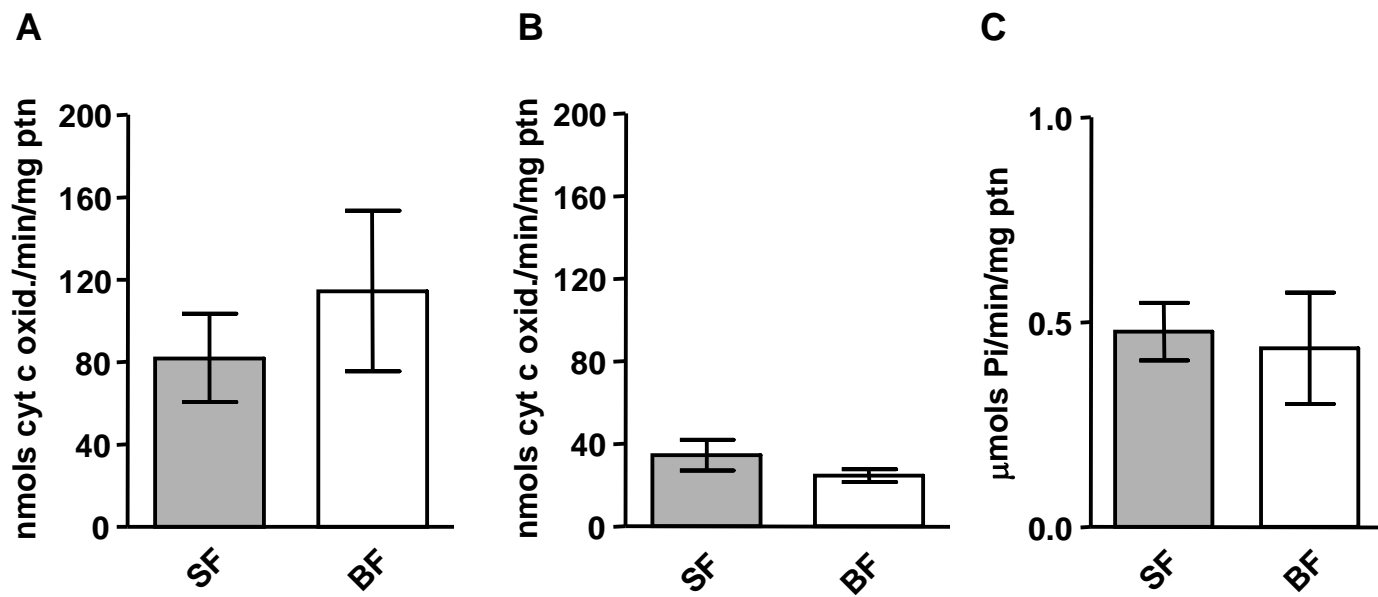

Figure S1:
